# Supplementary material
Source: Elsevier journal article supplement (https://www.sciencedirect.com/science/article/pii/S0210480617301237)
Supplement: mmc2 [file S0210480617301237:mmc2.pdf]

## RECAPITULACION DE MI PROCESO ANTE POSIBLE REVISION

=====

En las cuartillas anteriormente enviadas, expuse con algun detalle, mi detención, forma en que se desenvolvió la declaración y encarcelamiento; paso ahora a exponer como fué el juicio, y al final haré una serie de consideraciones, que no pude hacerlas al declarar, ni en el juicio.

### JUICIO

Fuimos 14 personas: 3 médicos, 3 practicantes, 3 enfermeros y 5 enfermeras.

Se leyó la acusación. Aunque creo tiene Vd un escrito en que expongo la marcha del juicio, le repetiré, por si le aporto algun nuevo dato.

BASANEZ. Que soy afiliado a Acción Vasca.

Que contribuí con AYENSA y BORRERO a derribar la Junta del Hospital, a raíz del advenimiento de la República.

Que laboré por la libertad del denunciante y de algun otro con mucho interes, cuando fué detenido por los "rojos".

VALERO.. Que soy desafecto al Régimen NACIONAL

Que pedí la creación de la Facultad.

Que en unión de otros compañeros hice se construyeran los Laboratorios de la Facultad, en el Hospital, y se les pusiera la inscripción de su nombre (el del sabio ACHUCARRO) en vascuence.

Que soy (era) Subdirector del Hospital por influencias políticas

ARREDONDO Que soy de Acción Vasca

Que como Subdirector, nombré enfermeras Nacionalistas

Que he hecho manifestaciones, contra el régimen Nacional.

### Mi declaración ante el Juez

Como antes he dicho, sólo preste declaración una vez ante el Juez brevemente y coaccionado. A muchos procesados, se les amplió su declaración; a nosotros no. En el sumario se dice (lo sé por que lo leyeron en el Juicio) que los acusadores, depusieron una segunda vez, ratificándose en sus declaraciones, pero a nosotros no se nos pidió ratificación ni ampliación por el Juez, que pidió la ratificación a los acusadores.

### Mi declaración ante el Juez.

No pertenezco a Acción Vasca desde Enero de 1936. El asunto de sustitución de la Junta del Hospital en 1932, fué un asunto puramente politico-municipal, promovido por todas las minorias que apoyaban la República en el Ayuntamiento; sé que alguien me atribuyó participación en este hecho, por ser en aquel entonces yo afiliado a Acción Vasca, pero no la tuve. No soy desafecto al régimen Nacional. No tuve ninguna participación en la construcción de los Laboratorios de la Facultad, ni en la inscripción euzkerica, que les da el nombre de ACHUCARRO. Fui nombrado Subdirector por el Director, a quien dejó la Junta en completa libertad para hacer este nombramiento. No he nombrado ninguna enfermera por ser Nacionalista. Aunque partidario de la Facultad, no hice nada por su creación; se creó por espontánea iniciativa del Consejero de Cultura.

### Interrogatorio del Fiscal

¿Cuándo se afilió a Acción Vasca? A raíz de la proclamación de la República y me di de baja en Enero de 1936

¿Porqué le nombraron Subdirector? Me nombró el Director libremente, en virtud de oficio que le dirigió la Junta y en el cual se le decía que podía nombrar Subdirector a uno cualquiera de los cuatro Jefes de Cirugía

¿Pero por qué méritos le nombró a Vd? No soy el indicado para enumerar mis méritos; eso lo sabrá el Director. Aquí tienen Vds



el oficio en que el Director me copia el acuerdo de la Junta y en su cumplimiento me nombrá (como la Junta le dice en su oficio) entre los Jefes. Además me consta que el Director consultó el caso con los otros Jefes, dos de ellos derechistas (SALDAÑA y GARCIA ALONSO) y coincidieron en mi nombre. Además yo devolví el sueldo de la Subdirección a la Clínica del Hospital (acto seguido entregué el oficio y el recibo de haber devuelto el sueldo, al Defensor)

¿Pero Habia Subdirector anteriormente? Ultimamente no, pero si en épocas anteriores.

### Interrogatorio del Defensor

¿Porque se dió Vd de baja en Acción Vasca? Porque Acción que nació con un contenido de colaboración y de transigencia, sufrió una evolución extremista. En Diciembre de 1935 se esbozó un nuevo programa politico-social avanzado, que se llevó a la aprobación de una Asamblea General y como no prosperó nuestro criterio (contrario a aquel programa) nos dimos de baja varios afiliados y esta noticia apareció en varios periódicos (personalmente) y el órgano periodístico de Acción nos combatió.

¿Trabajó Vd. en alguna ocasión para que acción nacionalista vasca, se derminara Acción Vasca? Si

¿Porque? Porque encuadraba mejor este titulo a mi modo de entender el amor al Pais Vasco, dentro de la Unidad Española.

¿Que actuación tuvo Vd en la Facultad? Moderada, en medio de extremismos se me ofreció la presidencia de la Comisión de la Facultad, y se me eligió por votación para el cargo, que no quise aceptarlo y propuse para él al significado derechista Dn Cesareo DIAZ EMPARANZA. Me opuse a que el vascuence fuera asignatura obligatoria en la Facultad.



### Acusación Fiscal

Resumiendo dijo lo siguiente: Que era el jefe de la pandilla, que conseguí la Subdirección, para desde ella hacer labor separatista; que lleve el vascuence a la enseñanza

### Peticiones fiscales

Los 14 procesados no teníamos comunidad alguna, en los supuestos delitos. El fiscal pidió: para 9 hombres 16 penas de muerte, 2 cadenas perpetuas, y para el otro 12 años y un día (los otros dos médicos tuvieron petición de pena de muerte) Para las 5 mujeres: 1 pena de muerte y 4 cadenas perpetuas. Una pena de muerte fue cumplida, otra parece va a cumplirse; las demás han sido denegadas unas por el tribunal o indultadas luego a las 4 mujeres y a mí, se nos ha confirmado la petición fiscal en la sentencia; a los demás se les ha condenado a 12 años y 1 día y se ha confirmado la petición al procesado para quien el fiscal pidió 12 años y 1 día.

### Informe del defensor

Hizo mi defensa en último término; dijo que si en cuanto a los anteriores defendidos había alguna duda, en cuanto a mí respectaba, la claridad de actuación era absoluta. Se me nombró Subdirector por elección unánime del Director y de los compañeros; cedí la presidencia de la Facultad a un derechista y no fui en ella otra cosa, que un miembro más, como varios significados derechistas. Ha hecho bien el Sr Fiscal -dijo- en no insistir sobre el asusto de la Facultad. Cuando el procesado vió el rumbo que seguía Acción se dió de baja; tuvo dificultades para avalar la tarjeta de control, porque no pertenecía a partido político alguno; pero si todo esto no basta, aquí hay una serie de testimonios de personas derechistas y seguidas, que espontáneamente me han presentado en favor del procesado; en este momento sacó un manojo de escritos y leyó parte de uno de ellos, el



al Ejercito y pidió que estos documentos se unieran al sumario.

El defensor no hizo petición de penas; dijo que dejaba su apreciación al criterio del tribunal

#### Mi declaración al terminar el Juicio

No pude extenderme, porque me interrumpió el Presidente; me lamenté de que me atacaran personas a las que no había hecho más que bien, protegiéndolas de persecuciones.

#### Documentos que entregué en el acto del juicio

Aparte de los documentos entregados por su cuenta por los derechosistas perseguidos, del oficio de nombramiento de Subdirector y del recibo de las cantidades devueltas en beneficio de la Clinica del Hospital, entregué al defensor en el acto del juicio, los siguientes: a) un oficio del coadjutor en funciones del parroco de San Juan, en el que se decía que al comienzo de la guerra, encontrándose seriamente preocupados por la suerte que pudieran correr las joyas y objetos de culto, de gran valor, de la Parroquia y ante posibles extremismos, me ofrecí a guardarlas con grave riesgo para mí, y que al entrar en Bilbao el Ejercito Nacional, las devolví íntegramente y en perfecto estado de conservación b) Varias cartas de médicos presos y de algun enfermo, demostrándome su agradecimiento por gestiones mías en favor de ellos.

#### RAZONAMIENTOS EN MI DEFENSA QUE NO PUDE HACERLOS ANTE EL JUEZ NI JUICIO

##### Actuación en el Hospital

En Enero del año actual, habiendo dimitido el Director Dn Jesus ARRESE, acordó la Junta, nombrar un a modo de Comité de Dirección, presidido por el Jefe más antiguo, Dn Gesareo Diaz EMPARANZA, como Director. Este



-6-

colega recibió con este motivo un oficio de la Junta, que venia a decir poco más o menos lo siguiente: Por dimisión fundada en motivos de salud del Director Sr ARRESE, La Junta ha acordado nombrar a Vd. Director del Hospital, en cuyo cargo colaborará con el Administrador en las cuestiones administrativas y con un Jefe de Cirugia libremente elegido por Vd, y que actuará en aquellas funciones que Vd delegue en él.

Dn Cesareo DIAZ me visitó en mi domicilio y me propuso fuera yo su colaborador; el motivo de tener que ser un Jefe de Cirugia, era que el Director era internista y estando -como estabamos- en plena guerra, necesitaba la colaboración de un cirujano. Le expuse las dificultades del caso en aquellos momentos y mi poca inclinación a aceptarlo; le añadí, que acaso otro jefe de Cirugia lo aceptaria gustoso, y me contestó, que habia consultado el caso con los otros tres jefes y unánimemente acordaron que ocupara yo el puesto; es más -me dijo- yo creo y así se lo he manifestado al vocal Sr HERRAN, que Vd debía ser nombrado DIRECTOR. Esto lo repitió mas tarde en la primera reunión de la Junta, en la que se nos dió posesión del cargo.

Yo sinceramente apetecia poco el cargo en aquellos momentos. Dn Cesareo insistió en su proposición haciendo un llamamiento a nuestro amor al Hospital, que atravesaba circunstancias verdaderamente difíciles. Me tomé 24 horas para decidir, consulté el caso con los amigos, y al día siguiente comuniqué a Dn Cesareo que lo aceptaba. Este me entregó un oficio en el que después de comunicarme el oficio que a su vez habia recibido, de la Junta, me rogaba, aceptara el puesto; este oficio entregué al defensor segun he dicho antes.

En la primera reunión de la Junta, manifesté (lo cual consta en acta) que no queria autonomia alguna, y que no daria paso alguno sin contar con Dn Cesareo, lo cual cumplí hasta en el detalle más insignificante.

En primer problema serio con que nos encontramos, fué, que la Jun



...por la Consejería de Sanidad, había comunicado al Ayuntamiento que no podía seguir rigiendo el establecimiento en aquellas condiciones, y el Ayuntamiento en sesión pública, acordó ceder el Hospital Sanidad; esto suponía la desorganización del Centro, pues, Sanidad (y especialmente la Civil) fué el departamento del Gobierno vasco que cometió mayores torpezas.

Consultado el caso con los restantes jefes, y de acuerdo con Herran, trabajamos intensamente para mantener la autonomía del Hospital, y pese al acuerdo del Ayuntamiento, lo logramos. Con esta actuación se consiguió defender los intereses del Hospital, pero también -principalmente- los del personal derechista (la mayoría) al que se quería suplantarse en sus puestos. La batalla fue larga y dura, y tuve participación de primer orden en ella.

Al amparo de esta autonomía, se reorganizaron los servicios; se comprenderá no hablé ahora de asuntos técnicos, pero sí recordaré, que la Junta, creo que en sesión de Marzo, acordó un voto de gracias muy elogioso para Dn Cesareo y para mí, que consta en acta. La Junta tenía representantes de diversas ideologías, pero como acudían pocos izquierdistas, tenían de hecho, mayoría las derechas. Dn Juan Ulpiano MIGOYA, Dn Agustín HERRAN, MUZQUIZ y algún otro, asistieron a la sesión en que se acordó el voto de gracias.

Como resumen de nuestra actuación con el personal, recordaré, que durante los seis meses, no hubo un solo ascenso, ni una protergación, ni un nombramiento de favor o de orden político. Un sólo enfermero fue destituido por orden expresa de la Dirección General de Seguridad y acto seguido, lo ingresamos como enfermo en una sala, para evitarle nuevas persecuciones.

En nuestra época se hicieron nombramientos de dos grupos distintos de enfermeras tituladas; uno de estos grupos fue nombrado exclusivamente por Sanidad Militar, cubriendo ella con el pago de los haberes. El grupo de enfermeras que nosotros nombramos, lo hicimos mediante un con-



-8-

curso, que se anunció en la Prensa; no se exigió mas méritos que el título, sin condición política alguna. El concurso fue juzgado por un tribunal compuesto por todos los Jefes de Medicina y Cirugia y acudieron al acto del examen de las concursantes Bn Cesareo DIAZ EMPARANZA, Dn Eusebio GARCIA ALONSO, Dn. Abilio SALDAÑA (todos de derecha) Dn Ramón R. MATA, Dn Francisco PEREZ ANDRES y yo; no hubo discusión y nombramos 18 entre 20 aspirantes, eliminando sólo a 2, una por no tener la edad reglamentaria y a la otra por no tener título; entre las nombradas habrá seguramente nacionalistas (yo no se quienes) pero he sabido que las hay de derecha como Dña Ma Luisa MARTINEZ, Concepción MANGAS y Teresa LOPEZ de GUEREÑO (sobrina del capellan del Hospital) Además tengo que añadir, que el acuerdo de nombrar enfermeras y el acuerdo de aceptar el informe del Tribunal, acerca de las propuestas para los cargos, es de la Junta y consta en acta. El nombramiento de enfermeras, molestó a las monjas; pero cuando un vocal de la Junta (el Sr. GARBISU) pretendió que las enfermeras sustituyeran a las monjas, yo defendí con todo calor a éstas, como lo pueden atestiguar los Srs HERRAN y MIGOYA.

Cuando conseguimos independizar el Hospital del Gobierno Vasco, la única condición en que cedimos, fué en aceptar el nombramiento de un Delegado de Sanidad Militar en el Hospital, que pasó a ser un vocal más de la Junta. En todo momento evitamos que dicho vocal, diera un sentido político a la organización del Hospital.

El Hospital, durante este periodo, fué un oasis para los perseguidos; en él acogimos a muchos sanitarios sin cargo alguno, que comían y dormían, sin salir del Establecimiento, entre otros: ARREDONDO, OJEDA, Dn Eloy DURRUTI, UBEDA, BAREÑO, MARTIN ARAGON, ninguno de los cuales fué molestado en lo más mínimo.

Cuando fué encarcelado algun miembro, hicimos diversas gestiones para conseguir su libertad, y así VALERO, AZAOLA, BRAVO etc. estuvieron detenidos sólo horas o pocos días; el único que estuvo detenido durante mucho tiempo, fué BASANEZ, quien reconoce en su acusación, que su detención existió "apesar" de las gestiones que yo hice, por su libertad.



gui a los milicianos en su retirada a Santander y fueran allí contra su deseo.

Los últimos días se emplazaron en el muro Norte del Hospital, dos de ametralladoras y después de una gran protesta, logré que se retiraran.

La vispera de la entrada de los Nacionales, me comunicaron VALE e IRURITA, que se temía un asalto a la Comunidad Religiosa. Fui a Bilbao con gran peligro -pues caían muchas balas en la población- y traje 20 policías que montaron guardia a la Comunidad y no hubo tal asalto.

Uno de los asuntos que más nos preocuparon en la Dirección, fue la protección a los enfermos y heridos presos. Cuando ocupamos el cargo había ingresados de esta calidad, en número no inferior a 60, procedente la mayor parte de los asaltos a las Cárceles, y existía un ambiente de gran excitación contra ellos, fuera y dentro del Hospital, entre ciertos empleados subalternos. Un guardia que les vigilaba les amenazó de muerte caso de que hubiera otro bombardeo. El diario C. N. T. publicó un sueltito censurando a la dirección, porque -decía- se trataba a los perseguidos de derechas, con privilegios que se negaba a los demás enfermos.

Acudimos a la Dirección General de Seguridad, denunciarnos el suceso del periodico, pusimos en su conocimiento las amenazas del guardia y conseguimos que fueran substituidos los guardias de Orden Publico por los Ertzañas, que actuaron con gran moderación, impidiendo que ocurriera el menor indidente.

No describiré los actos míos en favor de los presos enfermos, o heridos, porque los han certificado ellos.

Finalmente fui yo quien se enfrentó en el Hospital con los grupos sindicales de enfermeros y practicantes, ganándome su animaversión, al oponerme a sus exageradas pretensiones.



-10-

No quise hacer en el juicio, cuando el Fiscal me lo preguntó, una enumeración que pudiera parecer pedantesca, de los méritos que tenía para ser Subdirector del Hospital, pero podría haber enumerado los siguientes: Premio extraordinario, por oposición con el nº 1, de la Facultad de Valladolid; Miembro del Hospital, desde 1920, en que ingresé como interno; ayudante por oposición convocada en época de una Junta de derechas; Jefe por oposición convocada en época de derechas; Presidente de la Academia de Ciencias Medicas de Bilbao, por aclamación, entidad absolutamente apolítica.

En cuanto a la insinuación del Fiscal, de que antes de mi nombramiento, no había habido Subdirector, acaso no quedó refutada lo bastante en mi contestación. No hubo Subdirector en la época del anterior Director Sr ARRESE, porque obligado este Director en su contrato con la Junta a dedicarse exclusivamente a la Dirección, no exigía ningún colaborador subalterno; pero elegido Dn CESAREO, sin que la Dirección le obligara a abandonar su cargo de Jefe Clínico, ni su clientela privada (ambas cosas prohibidas al Sr ARRESE) era lógico tuviera un colaborador, y que este en época de guerra, fuera un cirujano. Con la excepción del Sr ARRESE (y ello por las razones dichas, de prohibición de tener clínica hospitalaria, ni ejercicio profesional libre) en todas las épocas y todos los Directores han sido secundados y ayudados en sus tareas por un Subdirector.

Testigos de mi actuación en el Hospital son: Juan U. MIGOYA, Juan A. HERRAN, MUZQUIZ (que ya ha salido de la cárcel) y esta dispuesto a certificar cuanto sabe) como miembros de la Junta (Seguiste).

Cesareo DIAZ EMPARANZA y GARCIA ALONSO, como Director el primero y Jefe de Clínica el otro, ~~así como Saldana se prestaría a testimoniar, pero es hombre ambiguo y flojo.~~

Supongo que aunque se hayan perdido los documentos de personas del Hospital, que testimoniaron a mi favor, se conservarán copias; pero si así no fuera, indicaría yo que enfermos y personal subalterno podrían testimoniar mi protección a enfermos y heridos derechistas.



ni hubiera solicitado nada, me enteré de una disposición aparecida en el Boletín Oficial del Gobierno Vasco, por la que se creaba la Facultad de Medicina, y se designaba una comisión organizadora, en la cual aparecía, entre otros, mi nombre. La comisión la formábamos Arróspide, Garate, Luis Bilbao, Aranguren, Cincunegui, Castaños, Lopez Albo y yo. En la primera reunión de esta comisión, dije que echaba de menos la presencia de prestigiosos compañeros de significación derechista, y dí a entender que no aceptaba el puesto, si no se ampliaba la Comisión con algunos nombres. Propuse a Dn Cesareo DIAZ, Eguiluz, Saldaña, Beltran (todos derechistas) y algun otro. Se aceptó la propuesta, y desde aquel momento, actuó en pleno la comisión, con los nombres indicados y algun otro como el Presidente del Colegio Médico.

Debo advertir, que desconozco, si al ser yo nombrado miembro de la comisión, lleve mi representación personal o la de Presidente de la Academia de Ciencias Médicas, aunque en la prensa apareció mi nombre, sin alusión a dicho cargo.

En una de las primeras reuniones se me ofreció la presidencia de la Comisión, que rechacé e impuse el nombre de Dn Cesareo DIAZ, quien fué Presidente, con Luis BILBAO, como Secretario y delegado del Consejero en la comisión y "factotum" de ella. BELTRAN fue nombrado Vicepresidente.

Cuando en mi declaración ante el Juez, dije que aunque partidario de la Facultad no la solicité, quise decir, que era partidario de una Facultad y de una Universidad de sentido amplio y universal, que es lo que etimologicamente significa la palabra universidad. Este criterio, opuesto al de universidad localista, lo he manifestado siempre y en todas partes entre otras muchas razones, por que benefician la enseñanza. En la idea de que el Estado Español crearia en Bilbao una Facultad de Medicina, como se proyectó desde los tiempos de BURIEL, en repetidas ocasiones, firmé de oposiciones a Cátedras de Cirugía, una de ellas, para la cátedra de Madrid.



-12-

en la esperanza de prepararme para las oposiciones para la proyectada cátedra de Bilbao. Con este modo de entender la Facultad, me opuse a toda clase de localismos, en el seno de la comisión, y sostuve que la que se "creaba" debía reducirse a examinar a los elementos pendientes de examen por causa de la guerra, y ~~hacer~~ hacer una labor didáctica reducida, dejando para la post-guerra, la organización de una Facultad de sentido amplio y liberal, en la selección de personal.

Me opuse tenazmente a que el vascuence fuera considerado como aprendizaje obligatorio en la Facultad y logré prosperar mi criterio, en votación, aunque después el Consejero <sup>1)</sup> por cuenta propia revocó nuestro acuerdo. Propuse que antes de inaugurar las clases, se nombrara una Comisión para hacer gestiones en favor de los sanitarios presos, y más tarde renové la proposición, formándose la Comisión, en la que me incluí, realizando, en grupo unas veces y aisladamente otras, numerosas gestiones en favor de los compañeros presos. Conseguí -no sin lucha- que en el Concurso para nombrar profesores, no se tuviera en cuenta la filiación política de los aspirantes, y así fue nombrado un claustro derechista, en su mayoría.

Pueden testimoniar esta actuación mía, Dn Cesareo DIAZ, BELTRAN, SALDAÑA y GARCIA ALONSO.

No tuve ninguna participación en la construcción del pabellón para Laboratorios de la Facultad, en el Hospital; esto fue, obra exclusiva de D. Luis Bilbao, a quien interesaba personalmente esta obra, por ser anarquista y tenía gran influencia personal con el Consejero. De la inscripción en vascuence, la primera noticia la tuve al verla puesta. Lo único que hice a este respecto, fué, sugerir que el pabellón se denominara de ACHUCARRO, médico apolítico y de prestigio universal.

Espero poco de los compañeros presos por quienes me interesé. Mi actuación en este sentido conocen TEJADA y CASTILLO de San Sebastian, y LEGUINA, SILVAN, AGUIRRE, Ciriaco OLAVARRIA y otros de Bilbao, pero insisto en que no espero nada de ellos.

(1) Leizola



### Cambio de la Junta del Hospital en 1932

El pleito del Ayuntamiento, respecto a la propiedad del Hospital con la Junta que lo regía, era viejo. En 1920, el entonces alcalde LAISECA quiso sustituir la Junta y logró cambiar sus estatutos. En aquella época apoyé en unión de los demás internos al Director Dr. AREILZA y a la Junta en un pleito largo y ruidoso. Durante la Dictadura del General PRIMO de RIVERA, el alcalde Sr Moyua, pretendió incautarse del Hospital y cambiar la Junta.

A raíz del advenimiento de la Republica, se promovió este asunto. Todas las minorías que apoyaban a la Republica, votaron por el cambio de Junta y por la total reintegración del Hospital al Ayuntamiento. El asunto se discutió en sesiones públicas. En la prensa de Noviembre o Diciembre de 1932 habrá información sobre este asunto. Yo tuve mi opinión personal pero sin la menor exteriorización y menos actuación. Este asunto lo llevó el Sr LOPEZ ALBO, médico presidente de la comisión de Gobernación del Ayuntamiento. Hoy es el día que la España Nacional no ha repuesto a aquella Junta.

### Mi baja en Acción Vasca

Esta condensada en mi declaración ante el Fiscal y el Defensor. Nos dimos de baja bastantes afiliados. En el Pueblo Vasco de San Sebastián, apareció una nota sobre nuestra baja, pero sin dar nombres. También en un semanario de Acción se hizo alusión a ella, pero sin citar nombres (haciendo una caricatura de los "intelectuales" con lo cual se veía claramente que eramos nosotros) No me recaté en hacerla pública, entre mis relaciones. Desde mi baja, permanecí, totalmente apartado de la política.

No pertencí a ninguna de las dos agrupaciones sindicales que abarcaban a casi todos los médicos de Vizcaya y ello me costó sinsabores y persecuciones. En la única ocasión que publicamente una de ellas, qui



-14-

imponer su criterio -la agrupación de Médicos Vascos- con relación de un Congreso en Vitoria, patrocinado por médicos prestigiosos y de derecha, Dr. OREJA, Díaz EMPARANZA, JUARISTI etc. yo me puse en contra de dicha agrupación.

#### Mi actuación personal durante la guerra.

He considerado la guerra, como una calamidad y tomé desde un principio una posición, a modo de Cruz Roja, amortiguando en lo que estuvo en mi mano, sufrimientos y persecuciones.

Hice gestiones por la libertad de PEREZ del VAL, de OJEDA, de Dn Cipriano ABAD, libertades que se lograron. Me interesé por la libertad de los colegas VALERO, AZAOLA, BASAÑEZ, Bustinza (profesor de la Facultad) el cual está dispuesto a certificarlo.

No tuve ninguna actuación de hecho, ni siquiera de "dicho" contra ningún bando. No he comentado sus episodios mas que en el estrecho límite de mis íntimos amigos; mis acusadores no podrían señalar ningún comentario ni menos ningún hecho, contrario al nuevo Régimen.

Como amante del orden, presté a la Parroquia de San Juan, el servicio a que antes me he referido, ocultando sus joyas y objetos de valor destinados al Culto.

#### La personalidad de mis acusadores

Valero... Me acusa por un sentimiento irresistible de envidia. Se lo perdí no sinceramente. Cuando fue detenido, hice gestiones por su libertad, a petición suya, cerca del Juez Sr RASCHE y con éxito. Le comuniqué alborozado el buen resultado de la gestión. Estuvo semi oculto en el Hospital con dos policías "espías" hecho que lo conocía y que lo culté, a pesar de no estar dentro de las "normas hospitalarias."



Días antes de la entrada de los Nacionales, le propuse se trasladara con los 2 policías a la casa Galera, para que la transición fuera más suave, pues por allá se esperaba la entrada; le propuse para ello, aceptara un puesto de empleado en dicha casa de locos, pues se me había pedido personal para dicho centro.

Conocía Valero mis dificultades para avalar mi tarjeta de control militar, por no pertenecer a partido alguno, pues conjuntamente hicimos gestiones para conseguir dicho aval, y el del automóvil, sin que pudieramos presentar -como era requisito obligado- el sello de un partido político afecto al frente popular.

Vispera de la entrada de los Nacionales, se me abrazó lloroso, temblando me pregunté si le pasaría algo a última hora, a lo que le respondí que no.

Después de la entrada de los Nacionales, topé con él y me dijo "Puedes estar tranquilo, pues no te pasará nada"

Arredonde.... Era médico sin cargo en el Hospital; se acogió a él, por temer a persecuciones en la calle. Vivía en el Hospital sin ser molestado.

He cruzado pocas palabras con él. Un buen día me sugirió lograra yo un sueldo para él. No había ningún precedente de sueldo a personal médico no incluido en la nómina. No hice caso de su petición. No he tenido ningún roce con él, como no sea este.

En las declaraciones ante el Juez aparece como médico-ayudante de Ginecología del Hospital. Es falso. En aquella época no era nada; probablemente hoy lo será.

Basañez.... Perseguido por facista, hice muchas gestiones en su favor, lo cual le reconoce. Después de la entrada de los Nacionales me abrazó con gran cordialidad. Dijo que estaba agradecidísimo y le parecía.
